# Supplementary material
Source: PubMed Central journal article supplement (PMC7451208)
Supplement: NIHMS1502782-supplement-1.pdf [file NIHMS1502782-supplement-1.pdf]

**Supplementary Materials for "Bayesian Phase I/II  
Biomarker-based Dose Finding for Precision Medicine with  
Molecularly Targeted Agents"**

Table 1: True model parameters for the eight scenarios

|                 | Scenario 1               | Scenario 2             | Scenario 3           | Scenario 4                   |
|-----------------|--------------------------|------------------------|----------------------|------------------------------|
| $\beta_{T,0,1}$ | -0.2                     | 1.5                    | 1.8                  | 0.56                         |
| $\beta_{T,0,2}$ | 2.3                      | 3.5                    | 3.5                  | 3.06                         |
| $\beta_{T,1}$   | 1                        | -3.18                  | -3.18                | -0.4                         |
| $\beta_{T,2}$   | -0.2, 0, 0, 0, -0.2      | 0, 0, 0, 0, 0          | 1, 0, 1, 0, 0        | 0, 0, 0, -0.3, 0             |
| $\beta_{T,3}$   | -0.7, -0.6, 0, -1, -2    | 0, 0, 2, 0, 0          | -1, 0, 0, 0, 0       | 0, 0, 0, 0, -2.5             |
| $\beta_{E,0,1}$ | -0.4                     | -1.5                   | -1.5                 | 0                            |
| $\beta_{E,0,2}$ | 0.9                      | 0.5                    | 0.5                  | 1.5                          |
| $\beta_{E,1}$   | 1.4                      | -2                     | -2                   | -1.5                         |
| $\beta_{E,2}$   | -0.6, 0, -1, 0, 0        | 2, -0.2, 1, 1, 0       | 1.5, 0, 1.5, 0, 0    | 0.4, -0.44, 0.2, 0, -0.5     |
| $\beta_{E,3}$   | -1, 0, 0, -2, 0          | -3, -0.2, 3, 0.1, -0.2 | -2.4, 0, 2.7, 0, 0   | -2, 0, 0.5, -0.6, -0.7       |
| $\tau$          | -1                       | 2                      | 2                    | -3                           |
| $\sigma^2$      | 0.5                      | 0.5                    | 0.2                  | 1                            |
|                 | Scenario 5               | Scenario 6             | Scenario 7           | Scenario 8                   |
| $\beta_{T,0,1}$ | -0.2                     | 0.4                    | 1.8                  | 0.28                         |
| $\beta_{T,0,2}$ | 2.3                      | 2.9                    | 3.5                  | 1.48                         |
| $\beta_{T,1}$   | 1                        | -0.4                   | -3.18                | 1.2                          |
| $\beta_{T,2}$   | 0.5, -0.45, 0.1, 0, 0.1  | 0, 0, 0, -0.3, 0       | 1, 0, 1, 0, 0        | 0.45, -0.4, 0.05, 0, 0.15    |
| $\beta_{T,3}$   | -0.7, -0.6, 0, -0.1, -1  | 0, 0, 0, 0, -1.5       | -1, 0, 0, 0, 0       | 0, 0, 0, 0, 0                |
| $\beta_{E,0,1}$ | -0.4                     | 0.1                    | 21.3                 | 4.5                          |
| $\beta_{E,0,2}$ | 0.9                      | 1.6                    | 22.8                 | 5.7                          |
| $\beta_{E,1}$   | 1.4                      | -1.5                   | 1.8                  | -1.4                         |
| $\beta_{E,2}$   | -0.6, 0.2, -1, -0.3, 0.2 | 0, 0, 0.2, 0, -0.5     | -7.5, -8, -7.5, 0, 0 | -4 <sup>a</sup> , 0, 0, 3, 0 |
| $\beta_{E,3}$   | 1.1, -1, 0, -2, -0.1     | 0, 0, 0, 0, 2          | -2, 3.5, 3, -1, 0    | 0, 0, 0, 0, 0                |
| $\tau$          | -1                       | -3                     | 2                    | 0                            |
| $\sigma^2$      | 0.5                      | 1                      | 0.2                  | 0.4                          |

<sup>a</sup>-4 is the coefficient of the indicator of whether there is any alteration in the first 3 biomarkers

Figure 1: Probability of efficacy category 3 of the five doses for 16 biomarker patterns under the eight scenarios. Each sub-figure is for one biomarker pattern, which is listed on top. The eight curves represent the eight scenarios.

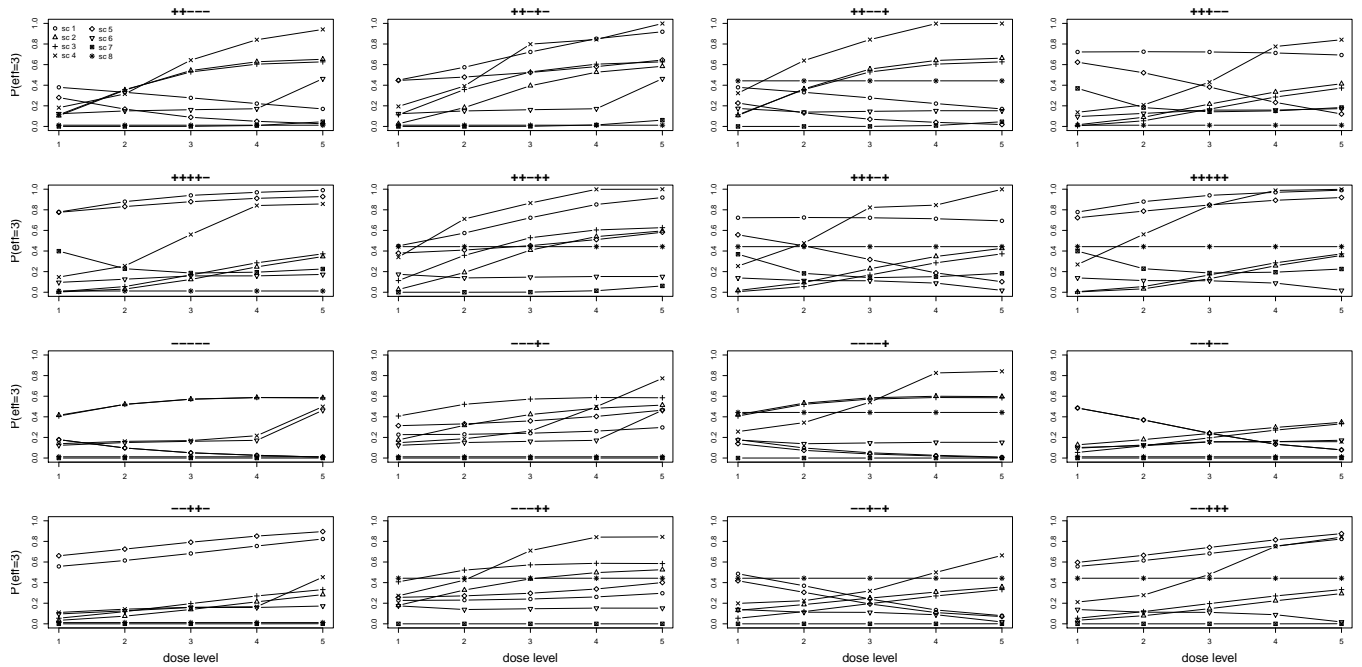

Figure 2: Probability of efficacy category 2 of the five doses for 16 biomarker patterns under the eight scenarios. Each sub-figure is for one biomarker pattern, which is listed on top. The eight curves represent the eight scenarios.

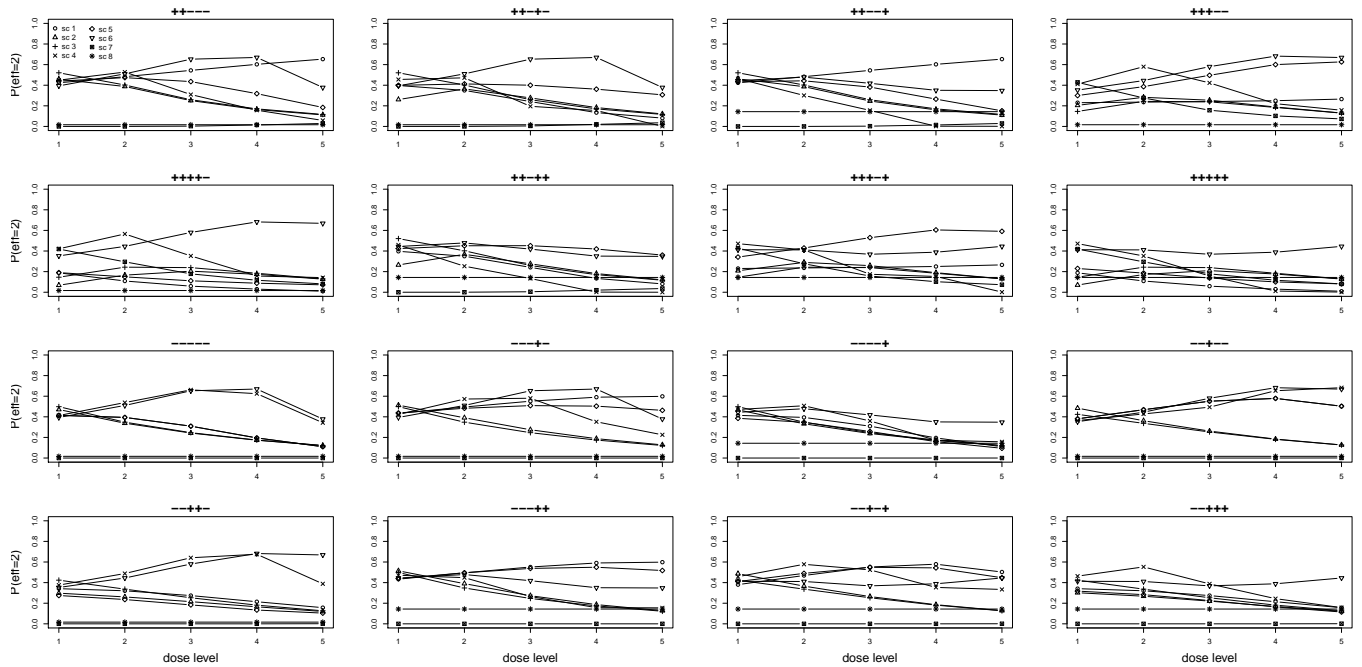

Figure 3: Probability of toxicity category 3 of the five doses for 16 biomarker patterns under the eight scenarios. Each sub-figure is for one biomarker pattern, which is listed on top. The eight curves represent the eight scenarios.

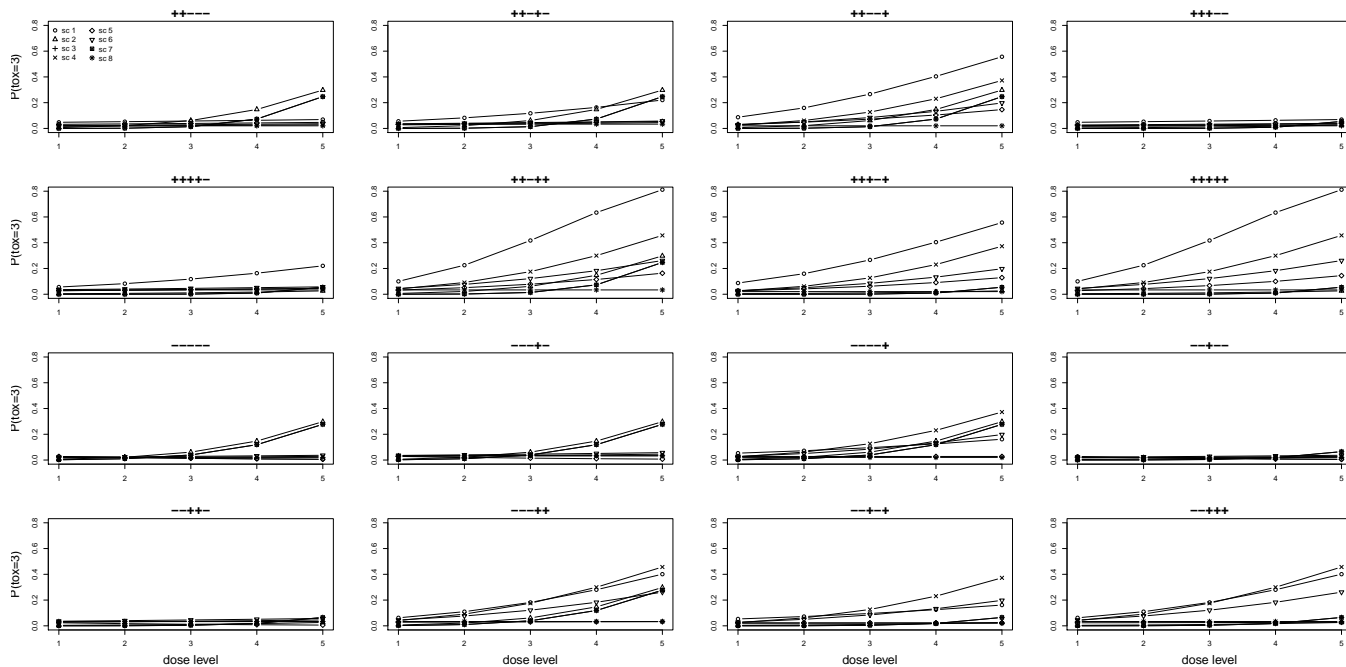

Figure 4: Bias of toxicity and efficacy probabilities for scenarios 1 to 4

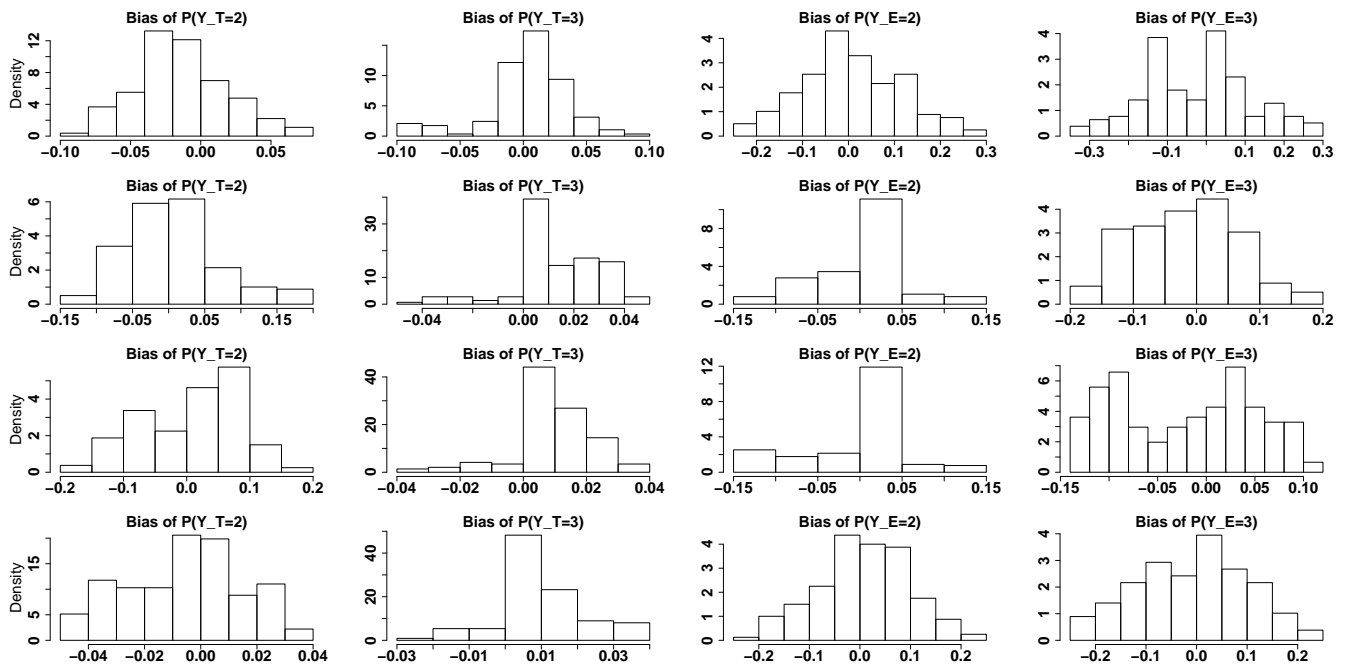

Figure 5: Bias of toxicity and efficacy probabilities for scenarios 5 to 8

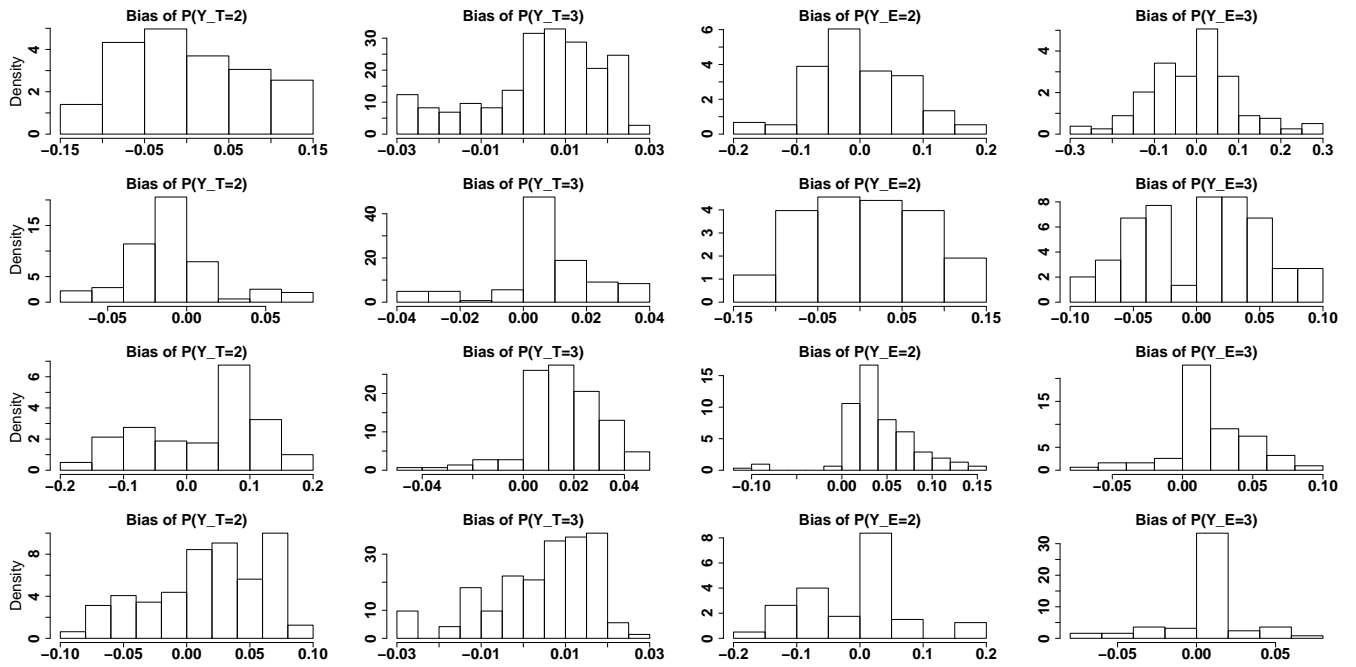

## Evaluation of the robustness of the CPLS components

We examined the robustness of the CPLS components at the end of the trial across 1000 simulated trials. Since a CPLS score is a linear combination of the covariates weighted by the CPLS loading weights, this is equivalent to evaluating the robustness (or similarity) of the 1000 loading weight vectors obtained from 1000 simulated trials. In order to do that, we used the idea of permutation test in cluster analysis. Specifically, we first calculated the mean Euclidean distance from the 1000 loading weight vectors to their centroid (the average of the 1000 loading weight vectors). We denote this observed mean distance as  $\bar{D}_{obs}$ . Next, we randomly permuted the loading weights within each vector and calculated the mean Euclidean distance from the permuted loading weight vectors to the centroid of the original loading weight vectors, denoted as  $\bar{D}_{per}$ . We conducted this permutation 1000 times and obtained the empirical distribution of  $\bar{D}_{per}$ . Under the null that there is no similarity among the loading weight vectors across simulations, the observed mean distance  $\bar{D}_{obs}$  should be located in the central area of the distribution of  $\bar{D}_{per}$ . The further  $\bar{D}_{obs}$  is away from the central area of the distribution of  $\bar{D}_{per}$ , the stronger the evidence that the loading weight vectors are similar across simulations. The Figure S6 below shows  $\bar{D}_{obs}$  versus the empirical distribution of  $\bar{D}_{per}$  for efficacy and toxicity in scenario 1. We can see that  $\bar{D}_{obs}$  is extremely unlikely under the empirical distribution of  $\bar{D}_{per}$ , suggesting the robustness of the loading weights across simulated trials. The patterns of the loading weights are similar for the other scenarios (results not shown).



Figure 6: Observed mean distance (indicated by solid lines) versus the distribution of mean distance from randomly permuted loading weights (depicted by dashed curves).

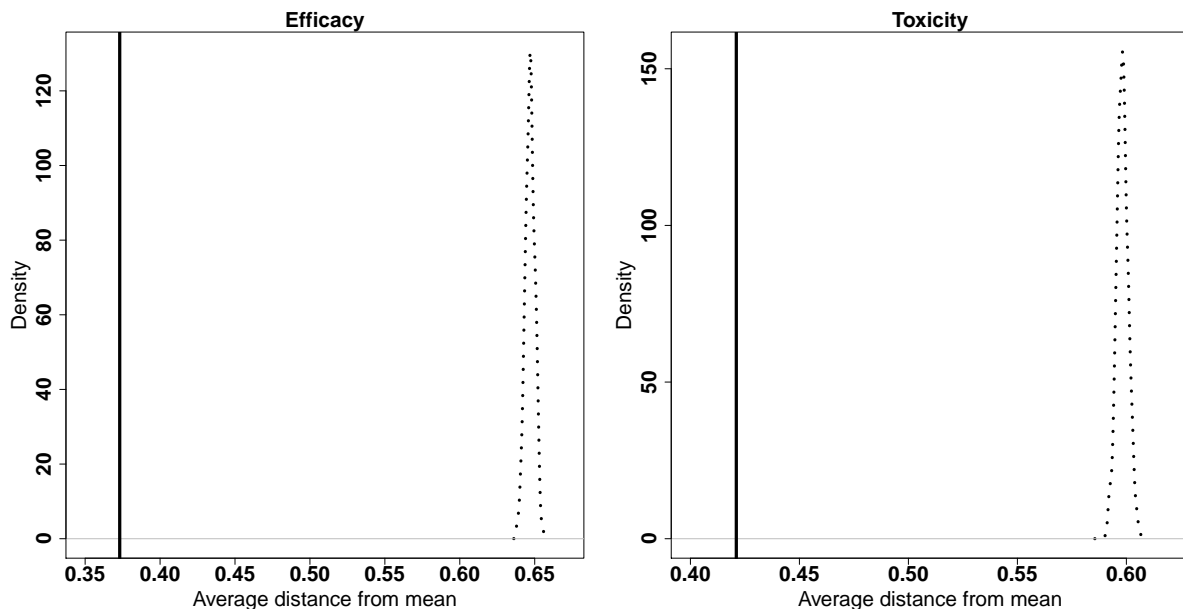

Table 2: Utility

|         | $y_E=1$ | $y_E=2$ | $y_E=3$ |
|---------|---------|---------|---------|
| $y_T=1$ | 0       | 50      | 100     |
| $y_T=2$ | 0       | 20      | 60      |
| $y_T=3$ | 0       | 10      | 20      |

Table 3: The average and standard deviation (SD) of the percentage of correct selection (PCS) of target doses across 32 possible biomarker patterns with the above utility.

| PCS  | Scenario |       |       |       |       |       |       |       |
|------|----------|-------|-------|-------|-------|-------|-------|-------|
|      | 1        | 2     | 3     | 4     | 5     | 6     | 7     | 8     |
| Mean | 0.661    | 0.704 | 0.722 | 0.772 | 0.714 | 0.652 | 0.680 | 0.823 |
| SD   | 0.20     | 0.24  | 0.16  | 0.30  | 0.23  | 0.19  | 0.27  | 0.17  |

Table 4: Utility

|         | $y_E=1$ | $y_E=2$ | $y_E=3$ |
|---------|---------|---------|---------|
| $y_T=1$ | 0       | 65      | 100     |
| $y_T=2$ | 0       | 35      | 75      |
| $y_T=3$ | 0       | 25      | 35      |

Table 5: The average and standard deviation (SD) of the percentage of correct selection (PCS) of target doses across 32 possible biomarker patterns with the above utility.

| PCS  | Scenario |       |       |       |       |       |       |       |
|------|----------|-------|-------|-------|-------|-------|-------|-------|
|      | 1        | 2     | 3     | 4     | 5     | 6     | 7     | 8     |
| Mean | 0.630    | 0.686 | 0.755 | 0.841 | 0.719 | 0.642 | 0.670 | 0.815 |
| SD   | 0.23     | 0.25  | 0.18  | 0.26  | 0.26  | 0.19  | 0.28  | 0.17  |

Table 6: The average and standard deviation (SD) of the percentage of correct selection (PCS) of target doses across all possible biomarker patterns under the proposed design and the direct approach with 2 biomarkers.

| Method          | PCS  | Scenario |       |       |
|-----------------|------|----------|-------|-------|
|                 |      | 1        | 2     | 3     |
| Proposed        | Mean | 0.802    | 0.752 | 0.93  |
|                 | SD   | 0.08     | 0.17  | 0.11  |
| Direct approach | Mean | 0.82     | 0.787 | 0.941 |
|                 | SD   | 0.07     | 0.19  | 0.05  |

Table 7: The average and standard deviation (SD) of the percentage of correct selection (PCS) of target doses across all possible biomarker patterns under the proposed design with 3 biomarkers.

|          | Scenario |       |       |
|----------|----------|-------|-------|
|          | 1        | 2     | 3     |
| Mean PCS | 0.74     | 0.722 | 0.659 |
| SD PCS   | 0.20     | 0.15  | 0.13  |

The direct approach broke down in this case with 3 biomarkers.

Table 8: The average and standard deviation (SD) of the percentage of correct selection (PCS) of target doses across 32 possible biomarker patterns under the proposed designs using CRM in Stage I.

| PCS  | Scenario |       |       |       |       |       |       |       |
|------|----------|-------|-------|-------|-------|-------|-------|-------|
|      | 1        | 2     | 3     | 4     | 5     | 6     | 7     | 8     |
| Mean | 0.717    | 0.711 | 0.696 | 0.772 | 0.719 | 0.721 | 0.685 | 0.824 |
| SD   | 0.17     | 0.23  | 0.16  | 0.31  | 0.24  | 0.11  | 0.26  | 0.17  |

## Posterior Inference

In our model, with standardized variables, the prior distributions for  $\beta_T$  and  $\beta_E$  are  $N(\xi_T, \Sigma_{T,0})$ ,  $N(\xi_E, \Sigma_{E,0})$ , respectively. As described above,  $\xi_T$  and  $\xi_E$  are vectors of 0's of lengths  $q_1$  and  $q_2$ , respectively, and  $\Sigma_{T,0}$  and  $\Sigma_{E,0}$  are  $q_1 \times q_1$  and  $q_2 \times q_2$  diagonal matrices with  $\sigma_0^2 = 1.25^2$  on the diagonal. Denote  $Z = (z_1, \dots, z_n)'$ ,  $\theta = (\theta_1, \dots, \theta_n)'$ ,  $\mathbf{Y}_T^* = (Y_{T,1}^*, \dots, Y_{T,n}^*)'$ ,  $\mathbf{Y}_E^* = (Y_{E,1}^*, \dots, Y_{E,n}^*)'$ . Let  $X_T$  and  $X_E$  be the design matrices for toxicity and efficacy models, respectively, and  $\Sigma_{Y^*}$  be the diagonal matrix with the  $i$ th diagonal element  $\exp(2\tau z_i)$ . The posterior full conditionals are below.

1.  $[\beta_T | D, \theta] \sim N\left((\Sigma_{T,0}^{-1} + X_T' X_T)^{-1}(\Sigma_{T,0}^{-1} \beta_{T,0} - X_T'(\mathbf{Y}_T^* + \theta)), (\Sigma_{T,0}^{-1} + X_T' X_T)^{-1}\right)$
2.  $[Y_{T,i}^* | D, \theta, Y_{T,i} = j] \sim N(-\theta_i - \beta_{T,1}\omega_{T,1,i} - \beta_{T,2}\omega_{T,2,i}, 1)I(\beta_{T,0,j-1} < Y_{T,i}^* \leq \beta_{T,0,j})$
3.  $[\beta_{T,0,j} | D, \theta] \sim N(0, \sigma_0^2)I\left(\max\{\max\{Y_{T,i}^* : Y_{T,i} = j\}, \beta_{T,0,j-1}\} < \beta_{T,0,j} \leq \min\{\min\{Y_{T,i}^* : Y_{T,i} = j+1\}, \beta_{T,0,j+1}\}\right), j = 1, 2$
4.  $[\beta_E | D, \theta] \sim N\left((\Sigma_{E,0}^{-1} + X_E' \Sigma_{Y^*}^{-1} X_E)^{-1}(\Sigma_{E,0}^{-1} \beta_{E,0} - X_E' \Sigma_{Y^*}^{-1}(\mathbf{Y}_E^* + \theta)), (\Sigma_{E,0}^{-1} + X_E' \Sigma_{Y^*}^{-1} X_E)^{-1}\right)$
5.  $[Y_{E,i}^* | D, \theta, Y_{E,i} = j] \sim N(-\theta_i - \beta_{E,1}\omega_{E,1,i} - \beta_{E,2}\omega_{E,2,i}, \exp(2\tau z_i))I(\beta_{E,0,j-1} < Y_{E,i}^* \leq \beta_{E,0,j})$
6.  $[\beta_{E,0,j} | D, \theta] \sim N(0, \sigma_0^2)I\left(\max\{\max\{Y_{E,i}^* : Y_{E,i} = j\}, \beta_{E,0,j-1}\} < \beta_{E,0,j} \leq \min\{\min\{Y_{E,i}^* : Y_{E,i} = j+1\}, \beta_{E,0,j+1}\}\right), j = 1, 2$
7.  $[\theta_i | D, \theta] \sim N(\mu_{\theta_i}, \sigma_{\theta_i}^2)$ , where  $\sigma_{\theta_i}^2 = \frac{1}{1+1/\exp(2\tau z_i)+1/\sigma^2}$  and

$$\mu_{\theta_i} = -\left(Y_{T,i}^* + \beta_{T,1}\omega_{T,1,i} + \beta_{T,2}\omega_{T,2,i} + \frac{Y_{E,i}^* + \beta_{E,1}\omega_{E,1,i} + \beta_{E,2}\omega_{E,2,i}}{\exp(2\tau z_i)}\right)\sigma_{\theta_i}^2$$

8.  $[\tau | D, \theta] \propto \prod_{i=1}^n \frac{1}{\exp(\tau z_i)} \exp\left(- (Y_{E,i}^* + \theta_i + \beta_{E,1}\omega_{E,1,i} + \beta_{E,2}\omega_{E,2,i})^2 / (2\exp(2\tau z_i))\right) [-c, c]$

9.  $[\sigma^2|D, \theta] \sim \text{InvGamma}(a + n/2, b + \sum \theta_i^2/2)$
